# Supplementary material for: Concentration of SARS-CoV-2 from large volumes of raw wastewater is enhanced with the inuvai R180 system
Source: bioRxiv or medRxiv preprint supplement (doi:10.1101/2021.07.21.21260907), 2021-07-22
Supplement: Supplementary file [file media-1.pdf]

**Supplementary Table 1.**

## Primers and probes used in this study

| Assay                     | Sequence (5' - 3') <sup>a</sup>                                                                                                                 | Length (bp) | Location in SARS-CoV-2 genome (bp) |
|---------------------------|-------------------------------------------------------------------------------------------------------------------------------------------------|-------------|------------------------------------|
| MNV                       | F: CACGCCACCGATCTGTTCTG<br>R: GCGCTGCGCCATCACTC<br>P: 6FAM-CGCTTTGGAACAATG-MGB                                                                  | 108         | 4,972 – 5,080                      |
| PEDV                      | F: CAGGACACATTCTTGGTGGTCTT<br>R: CAAGCAATGTACCACTAAGGAGTGTT<br>P: FAM-ACGCGCTTCTCACTAC-MGB                                                      | 140         | 26,010 - 26,149                    |
| SARS-CoV-2:<br>E_Sarbecco | F: ACAGGTACGTTAATAGTTAATAGCGT<br>R: ATATTGCAGCAGTACGCACACA<br>P: 6FAM-ACACTAGCCATCCTTACTGCGCTTCG-BHQ                                            | 112         | 26,141 – 26,253                    |
| SARS-CoV-2:<br>RdRp       | F: GTGARATGGTCATGTGTGGCGG<br>R: CARATGTTAAASACACTATTAGCATA<br>P1: 6FAM-CCAGGTGGWACRTCATCMGGTGATGC-BHQ<br>P2: 6FAM-CAGGTGGAACCTCATCAGGAGATGC-BHQ | 99          | 15,361 – 15,460                    |
| SARS-CoV-2:<br>N_Sarbecco | F: CACATTGGCACCCGCAATC<br>R: GAGGAACGAGAAGAGGCTTG<br>P: 6FAM-ACTTCCTCAAGGAACAACATTGCCA-BHQ                                                      | 127         | 28,555 – 28,682                    |

<sup>a</sup> W is A/T; R is G/A; M is A/C; S is G/C. FAM: 6-carboxyfluorescein; MGB: minor groove binder; BHQ: blackhole quencher.
